# Supplementary material for: Salt Spray and Surfactants Induced Morphological, Physiological, and Biochemical Responses in Callistemon citrinus (Curtis) Plants
Source: MDPI journal article supplement (doi:10.3390/horticulturae8030261), 2022-03-17
Supplement: s1 [file s1]

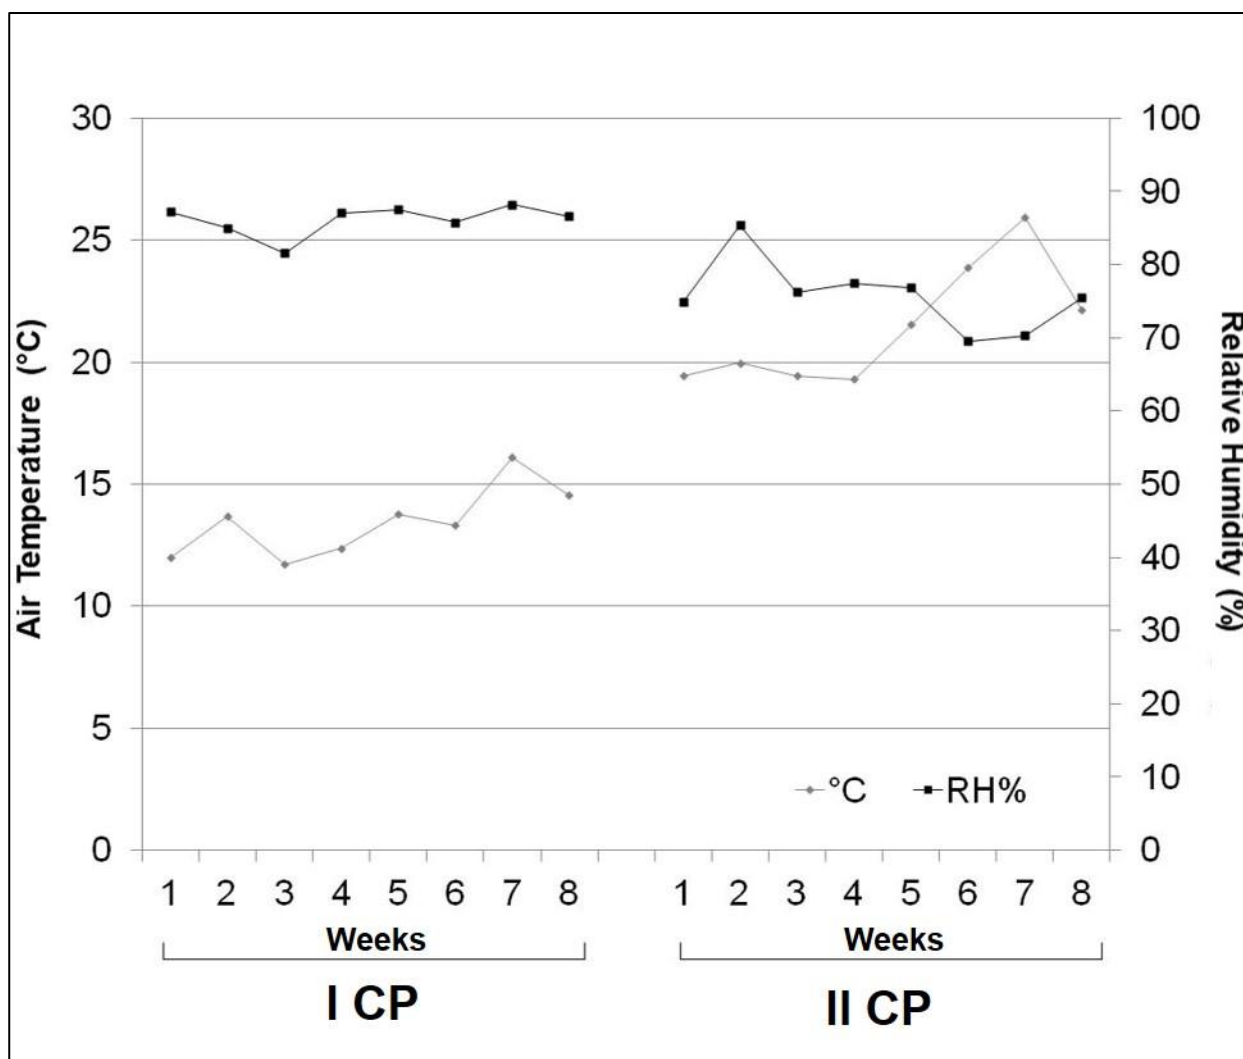

Figure S1: Air temperature (°C) and relative humidity (%) during the two cycle periods.

Table S1. Pearson's correlation coefficients among morphometric, physiological, and biochemical parameters from *Callistemon* potted plants exposed to different treatments during I CP.

|                   | TDW          | SDW          | R/S          | LN           | TLA          | Chl          | Na <sup>+</sup> L | Cl <sup>-</sup> L | Na <sup>+</sup> R | Cl <sup>-</sup> R | LD           | A <sub>N</sub> | gs           | Fv/Fm        | Pro         | SOD         | GPX        | CAT |
|-------------------|--------------|--------------|--------------|--------------|--------------|--------------|-------------------|-------------------|-------------------|-------------------|--------------|----------------|--------------|--------------|-------------|-------------|------------|-----|
| TDW               | -            |              |              |              |              |              |                   |                   |                   |                   |              |                |              |              |             |             |            |     |
| SDW               | 0.994<br>**  | -            |              |              |              |              |                   |                   |                   |                   |              |                |              |              |             |             |            |     |
| R/S               | -0.896<br>ns | -0.936<br>*  | -            |              |              |              |                   |                   |                   |                   |              |                |              |              |             |             |            |     |
| LN                | 0.993<br>**  | 0.999<br>*** | -0.930<br>ns | -            |              |              |                   |                   |                   |                   |              |                |              |              |             |             |            |     |
| TLA               | 0.986<br>**  | 0.997<br>**  | -0.942<br>ns | 0.999<br>*** | -            |              |                   |                   |                   |                   |              |                |              |              |             |             |            |     |
| Chl               | 0.657<br>ns  | 0.723<br>ns  | -0.214<br>ns | -0.407<br>ns | 0.772<br>ns  | -            |                   |                   |                   |                   |              |                |              |              |             |             |            |     |
| Na <sup>+</sup> L | -0.394<br>ns | -0.363<br>ns | 0.128<br>ns  | 0.744<br>ns  | -0.399<br>ns | -0.388<br>ns | -                 |                   |                   |                   |              |                |              |              |             |             |            |     |
| Cl <sup>-</sup> L | -0.371<br>ns | -0.351<br>ns | 0.148<br>ns  | -0.398<br>ns | -0.395<br>ns | -0.457<br>ns | 0.993<br>**       | -                 |                   |                   |              |                |              |              |             |             |            |     |
| Na <sup>+</sup> R | -0.173<br>ns | -0.214<br>ns | 0.214<br>ns  | -0.263<br>ns | -0.286<br>ns | -0.699<br>ns | 0.749<br>ns       | 0.820<br>ns       | -                 |                   |              |                |              |              |             |             |            |     |
| Cl <sup>-</sup> R | -0.633<br>ns | -0.569<br>ns | 0.382<br>ns  | -0.538<br>ns | -0.505<br>ns | 0.152<br>ns  | -0.038<br>ns      | -0.133<br>ns      | -0.581<br>ns      | -                 |              |                |              |              |             |             |            |     |
| LD                | -0.455<br>ns | -0.410<br>ns | 0.138<br>ns  | -0.450<br>ns | -0.434<br>ns | -0.312<br>ns | 0.986<br>**       | 0.961<br>*        | 0.632<br>ns       | 0.119<br>ns       | -            |                |              |              |             |             |            |     |
| A <sub>N</sub>    | 0.574<br>ns  | 0.529<br>ns  | -0.256<br>ns | 0.593<br>ns  | 0.548<br>ns  | 0.367<br>ns  | -0.963<br>*       | -0.933<br>ns      | -0.585<br>ns      | -0.555<br>ns      | -0.891<br>ns | -              |              |              |             |             |            |     |
| gs                | 0.644<br>ns  | 0.574<br>ns  | -0.254<br>ns | 0.564<br>ns  | 0.564<br>ns  | 0.157<br>ns  | -0.806<br>ns      | -0.740<br>ns      | -0.250<br>ns      | -0.231<br>ns      | -0.990<br>ns | 0.930<br>*     | -            |              |             |             |            |     |
| Fv/Fm             | 0.822<br>ns  | 0.841<br>ns  | -0.770<br>ns | 0.868<br>ns  | 0.877<br>ns  | 0.879<br>ns  | -0.717<br>ns      | -0.742<br>ns      | -0.704<br>ns      | -0.120<br>ns      | -0.694<br>ns | 0.608<br>*     | 0.752<br>ns  | -            |             |             |            |     |
| Pro               | -0.574<br>ns | -0.508<br>ns | 0.191<br>ns  | -0.534<br>ns | -0.508<br>ns | -0.181<br>ns | 0.883<br>ns       | 0.827<br>ns       | 0.369<br>ns       | 0.423<br>ns       | 0.948<br>*   | -0.989<br>**   | -0.969<br>*  | -0.627<br>ns | -           |             |            |     |
| SOD               | -0.457<br>ns | -0.411<br>ns | 0.134<br>ns  | -0.449<br>ns | -0.433<br>ns | -0.300<br>ns | 0.983<br>*        | 0.956<br>*        | 0.618<br>ns       | 0.134<br>ns       | 1.000<br>*** | -0.898<br>ns   | -0.991<br>** | -0.687<br>ns | 0.953<br>*  | -           |            |     |
| GPX               | -0.097<br>ns | 0.170<br>ns  | -0.437<br>ns | 0.136<br>ns  | 0.161<br>ns  | 0.277<br>ns  | 0.775<br>ns       | 0.728<br>ns       | 0.342<br>ns       | -0.016<br>ns      | 0.800<br>ns  | -0.685<br>ns   | 0.729<br>ns  | -0.127<br>ns | 0.759<br>ns | 0.804<br>ns | -          |     |
| CAT               | -0.008<br>ns | 0.028<br>ns  | -0.256<br>ns | -0.019<br>ns | -0.011<br>ns | -0.108<br>ns | 0.921<br>ns       | 0.918<br>ns       | 0.708<br>ns       | -0.271<br>ns      | 0.888<br>ns  | -0.630<br>ns   | -0.814<br>ns | -0.415<br>ns | 0.738<br>ns | 0.885<br>ns | 0.906<br>* | -   |

Each square indicates the Pearson's correlation coefficient of a pair of parameters. TDW: Total dry weight; SDW: Shoot dry weight; R/S = Root to shoot ratio; LN = Leaf number; TLA = Total leaf area; CHL = Chlorophyll content; Na<sup>+</sup> L = Na<sup>+</sup> leaves; Cl<sup>-</sup> L = Cl<sup>-</sup> leaves; Na<sup>+</sup> R = Na<sup>+</sup> root; Cl<sup>-</sup> R = Cl<sup>-</sup> root; LD = Leaf damage; A<sub>N</sub>: net photosynthesis; gs: stomatal conductance; Fv/Fm: chlorophyll *a* fluorescence; Pro: Proline; SOD: superoxide dismutase; GPX: glutathione peroxidase; CAT: Catalase; ns = not significant; \* P < 0.05; \*\* P < 0.01; \*\*\* P < 0.001.

Table S2. Pearson's correlation coefficients among morphometric, physiological, and biochemical parameters from *Callistemon* potted plants exposed to different treatments during II CP.

|                   | TDW          | SDW          | R/S          | LN           | TLA          | Chl          | Na <sup>+</sup> L | Cl <sup>-</sup> L | Na <sup>+</sup> R | Cl <sup>-</sup> R | LD           | A <sub>N</sub> | gs           | Fv/Fm        | Pro         | SOD         | GPX         | CAT |
|-------------------|--------------|--------------|--------------|--------------|--------------|--------------|-------------------|-------------------|-------------------|-------------------|--------------|----------------|--------------|--------------|-------------|-------------|-------------|-----|
| TDW               | -            |              |              |              |              |              |                   |                   |                   |                   |              |                |              |              |             |             |             |     |
| SDW               | 0.993<br>**  | -            |              |              |              |              |                   |                   |                   |                   |              |                |              |              |             |             |             |     |
| R/S               | -0.882<br>ns | -0.931<br>ns |              |              |              |              |                   |                   |                   |                   |              |                |              |              |             |             |             |     |
| LN                | 0.880<br>*   | 0.838<br>ns  | -0.626       | -            |              |              |                   |                   |                   |                   |              |                |              |              |             |             |             |     |
| TLA               | 0.972<br>*   | 0.940<br>ns  | -0.753       | 0.904<br>*   | -            |              |                   |                   |                   |                   |              |                |              |              |             |             |             |     |
| Chl               | 0.589<br>ns  | 0.492<br>ns  | -0.141<br>ns | 0.802<br>ns  | 0.748<br>ns  | -            |                   |                   |                   |                   |              |                |              |              |             |             |             |     |
| Na <sup>+</sup> L | -0.951<br>*  | -0.977<br>*  | 0.973<br>*   | -0.703<br>ns | -0.870<br>ns | -0.323<br>ns | -                 |                   |                   |                   |              |                |              |              |             |             |             |     |
| Cl <sup>-</sup> L | -0.970<br>*  | -0.967<br>*  | 0.872<br>ns  | -0.758<br>ns | -0.951<br>*  | -0.526<br>ns | 0.962<br>*        | -                 |                   |                   |              |                |              |              |             |             |             |     |
| Na <sup>+</sup> R | -0.862<br>ns | -0.899<br>ns | 0.940<br>ns  | -0.518<br>ns | -0.775<br>ns | -0.175<br>ns | 0.969<br>*        | 0.929<br>ns       | -                 |                   |              |                |              |              |             |             |             |     |
| Cl <sup>-</sup> R | -0.971<br>*  | -0.962<br>*  | 0.850<br>ns  | -0.774<br>ns | -0.963<br>*  | -0.565<br>ns | 0.948<br>*        | 0.999<br>***      | 0.911<br>ns       | -                 |              |                |              |              |             |             |             |     |
| LD                | -0.928<br>ns | -0.964<br>*  | 0.993<br>**  | -0.683<br>ns | -0.822<br>ns | -0.245<br>ns | 0.993<br>**       | 0.923<br>ns       | 0.955<br>*        | 0.905<br>ns       | -            |                |              |              |             |             |             |     |
| A <sub>N</sub>    | 0.828<br>ns  | 0.851<br>ns  | -0.853<br>ns | 0.470<br>ns  | 0.779<br>*   | -0.991<br>** | -0.922<br>*       | -0.931<br>ns      | -0.979<br>*       | -0.919<br>ns      | 0.348<br>ns  | -              |              |              |             |             |             |     |
| gs                | -0.671<br>ns | -0.581<br>ns | 0.243<br>ns  | -0.823<br>ns | -0.819<br>ns | 0.240<br>ns  | 0.430<br>ns       | 0.629<br>ns       | 0.300<br>ns       | 0.665<br>ns       | -0.605<br>ns | -0.687<br>*    | -            |              |             |             |             |     |
| Fv/Fm             | 0.449<br>ns  | 0.515<br>ns  | -0.671<br>Ns | 0.445<br>ns  | 0.261<br>ns  | -0.156<br>ns | -0.510<br>ns      | -0.292<br>ns      | -0.384<br>ns      | -0.265<br>ns      | -0.885<br>ns | 0.140<br>ns    | -0.368<br>*  | -            |             |             |             |     |
| Pro               | -0.725<br>ns | -0.798<br>ns | -0.958<br>*  | -0.464<br>ns | -0.545<br>ns | 0.110<br>ns  | 0.866<br>ns       | 0.696<br>ns       | 0.841<br>ns       | 0.664<br>ns       | 0.918<br>ns  | -0.715<br>ns   | 0.022<br>ns  | -0.805<br>ns | -           |             |             |     |
| SOD               | -0.755<br>ns | -0.825<br>ns | 0.974<br>*   | -0.438<br>ns | -0.590<br>ns | 0.086<br>ns  | 0.909<br>ns       | 0.765<br>ns       | 0.915<br>ns       | 0.734<br>ns       | 0.945<br>*   | -0.818<br>ns   | -0.018<br>ns | -0.691<br>ns | 0.985<br>*  | -           |             |     |
| GPX               | -0.761<br>ns | -0.702<br>ns | 0.456<br>ns  | -0.655<br>ns | -0.873<br>ns | -0.783<br>ns | 0.650<br>ns       | 0.833<br>ns       | 0.635<br>ns       | 0.856<br>ns       | 0.556<br>ns  | -0.739<br>ns   | 0.856<br>ns  | 0.236<br>ns  | 0.184<br>ns | 0.296<br>ns | -           |     |
| CAT               | -0.985<br>*  | -0.966<br>*  | 0.818<br>ns  | -0.948<br>*  | -0.974<br>*  | -0.679<br>ns | 0.890<br>ns       | 0.920<br>ns       | 0.763<br>ns       | 0.926<br>ns       | 0.868<br>ns  | -0.722<br>ns   | 0.741<br>ns  | -0.466<br>ns | 0.655<br>ns | 0.655<br>ns | 0.741<br>ns | -   |

Each square indicates the Pearson's correlation coefficient of a pair of parameters. TDW: Total dry weight; SDW: Shoot dry weight; R/S = Root to shoot ratio; LN = Leaf number; TLA = Total leaf area; CHL = Chlorophyll content; Na<sup>+</sup> L = Na<sup>+</sup> leaves; Cl<sup>-</sup> L = Cl<sup>-</sup> leaves; Na<sup>+</sup> R = Na<sup>+</sup> root; Cl<sup>-</sup> R = Cl<sup>-</sup> root; LD = Leaf damage; A: net photosynthesis; gs: stomatal conductance; Fv/Fm: chlorophyll *a* fluorescence; Pro: Proline; SOD: superoxide dismutase; GPX: glutathione peroxidase; CAT: Catalase; ns = not significant; \* P < 0.05; \*\* P < 0.01; \*\*\* P < 0.001.
